# Supplementary material
Source: Springer Nature journal article supplement (https://www.springermedizin.de/resource/supplementary/13014_2013_894_MOESM1_ESM.pdf/9634382)

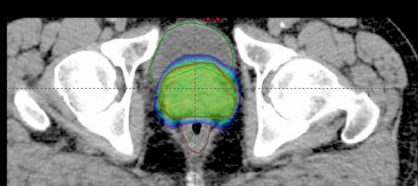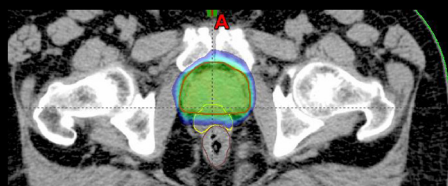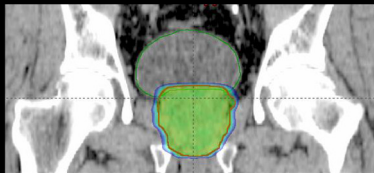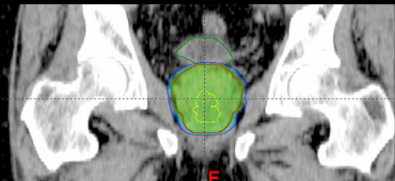

**A**

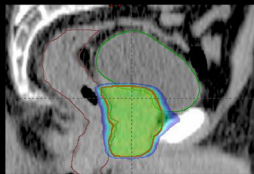

**B**

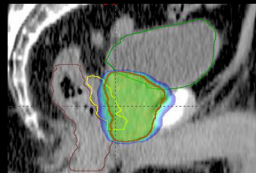

Supplement: MOESM1 [file 9634382]
